# Supplementary material for: Small RNA sequencing-microarray analyses in Parkinson leukocytes reveal deep brain stimulation-induced splicing changes that classify brain region transcriptomes
Source: Front Mol Neurosci. 2013 May 13;6:10. doi: 10.3389/fnmol.2013.00010 (PMC3652308; doi:10.3389/fnmol.2013.00010)
Supplement: Supplementary file 14 [file DataSheet13.XLSX]

## Sheet: ST10
Category	Term	Count	%	PValue	Genes	List Total	Pop Hits	Pop Total	Fold Enrichment	Bonferroni	Benjamini	FDR
SP_PIR_KEYWORDS	acetylation	19	25	0.0112316	EEF1A1, KIF11, FKBP5, SMC5, VPS53, RPS15A, C11ORF10, SIRT7, SOD1, ANXA2, CAPN1, DPY30, SRRM2, DNMT1, GSTO1, EIF3J, SPATS2L, PHF20L1, TOP2A	76	2635	19235	1.82495	0.869075	0.869075	12.9883
COG_ONTOLOGY	Cell division and chromosome partitioning / Cytoskeleton	3	3.94737	0.0130708	SEPT1, HERC5, IFI44L	15	25	1950	15.6	0.111671	0.111671	7.29229
GOTERM_BP_FAT	GO:0006281~DNA repair	5	6.57895	0.0219566	RAD51C, SMC5, UVRAG, SOD1, TOP2A	52	284	13528	4.58017	0.999999	0.999999	28.1341
GOTERM_BP_FAT	GO:0050665~hydrogen peroxide biosynthetic process	2	2.63158	0.0260988	CYBB, SOD1	52	7	13528	74.3297	1	0.999771	32.5326
SP_PIR_KEYWORDS	phosphoprotein	38	50	0.0266775	NDUFAF4, SEPT1, EFCAB6, FKBP5, UVRAG, VPS53, LARP1B, ZNF184, PRUNE2, SRRM2, COL6A2, GKAP1, EIF3J, KDM5B, TOP2A, AP2M1, SLC22A1, ANAPC1, EEF1A1, INADL, KIF11, ANP32E, NBPF11, SMC5, HEATR1, SIRT7, SOD1, TMEM209, FOXP4, ANXA2, MED31, SLC4A10, RPS6KA2, MLLT10, DNMT1, SPATS2L, DST, IFT74	76	7263	19235	1.32418	0.992305	0.912278	28.3275
GOTERM_CC_FAT	GO:0005604~basement membrane	3	3.94737	0.0372924	COL15A1, DST, ANXA2	51	78	12782	9.63952	0.996781	0.996781	36.5153
GOTERM_CC_FAT	GO:0031410~cytoplasmic vesicle	7	9.21053	0.0381742	ANP32E, SLC18A1, SOD1, DST, AP2M1, IFT74, ANXA2	51	642	12782	2.7327	0.997197	0.947061	37.207
GOTERM_BP_FAT	GO:0006259~DNA metabolic process	6	7.89474	0.0411306	RAD51C, SMC5, UVRAG, DNMT1, SOD1, TOP2A	52	506	13528	3.08483	1	0.99986	46.4734
SMART	SM00692:DM3	2	2.63158	0.0453191	THAP6, PRKRIR	36	12	9079	42.0324	0.901619	0.901619	36.0256
GOTERM_CC_FAT	GO:0031012~extracellular matrix	5	6.57895	0.045459	COL6A2, COL15A1, SOD1, DST, ANXA2	51	345	12782	3.63228	0.999111	0.90384	42.6628
GOTERM_CC_FAT	GO:0031982~vesicle	7	9.21053	0.0454744	ANP32E, SLC18A1, SOD1, DST, AP2M1, IFT74, ANXA2	51	670	12782	2.6185	0.999113	0.827423	42.6738
UP_SEQ_FEATURE	zinc finger region:THAP-type	2	2.63158	0.0460983	THAP6, PRKRIR	76	12	19113	41.9145	1	1	48.1757
SMART	SM00249:PHD	3	3.94737	0.0468061	MLLT10, PHF20L1, KDM5B	36	90	9079	8.40648	0.908995	0.69833	36.9789
SP_PIR_KEYWORDS	coiled coil	14	18.4211	0.0474373	TMEM18, KIF11, THAP6, NBPF11, UVRAG, SMC5, VPS53, SRRM2, COL6A2, GKAP1, EIF3J, SPATS2L, DST, IFT74	76	2019	19235	1.75497	0.999841	0.945848	45.0431
GOTERM_BP_FAT	GO:0042554~superoxide anion generation	2	2.63158	0.0479368	CYBB, SOD1	52	13	13528	40.0237	1	0.999585	51.857
INTERPRO	IPR019787:Zinc finger, PHD-finger	3	3.94737	0.0484337	MLLT10, PHF20L1, KDM5B	70	85	16659	8.3995	0.999907	0.999907	45.9579
INTERPRO	IPR006612:Zinc finger, C2CH-type	2	2.63158	0.0486018	THAP6, PRKRIR	70	12	16659	39.6643	0.99991	0.990518	46.0761
GOTERM_BP_FAT	GO:0006974~response to DNA damage stimulus	5	6.57895	0.0515499	RAD51C, SMC5, UVRAG, SOD1, TOP2A	52	373	13528	3.48732	1	0.998783	54.5052
INTERPRO	IPR001965:Zinc finger, PHD-type	3	3.94737	0.0536291	MLLT10, PHF20L1, KDM5B	70	90	16659	7.93286	0.999967	0.967802	49.5038
GOTERM_BP_FAT	GO:0008217~regulation of blood pressure	3	3.94737	0.0545843	EDN3, CORIN, SOD1	52	100	13528	7.80462	1	0.997345	56.6237
INTERPRO	IPR019786:Zinc finger, PHD-type, conserved site	3	3.94737	0.0568374	MLLT10, PHF20L1, KDM5B	70	93	16659	7.67696	0.999982	0.935148	51.5853
SP_PIR_KEYWORDS	acetylated amino end	3	3.94737	0.0581296	SOD1, CAPN1, ANXA2	76	100	19235	7.59276	0.999979	0.932454	52.177
GOTERM_BP_FAT	GO:0022402~cell cycle process	6	7.89474	0.0607126	ANAPC1, RAD51C, PRUNE2, KIF11, SIRT7, DST	52	565	13528	2.7627	1	0.996562	60.6247
GOTERM_BP_FAT	GO:0033554~cellular response to stress	6	7.89474	0.0610839	RAD51C, SMC5, UVRAG, SIRT7, SOD1, TOP2A	52	566	13528	2.75781	1	0.993229	60.8556
SP_PIR_KEYWORDS	extracellular matrix	4	5.26316	0.0680321	COL6A2, COL15A1, DST, ANXA2	76	241	19235	4.2007	0.999997	0.920853	58.0147
SP_PIR_KEYWORDS	alternative splicing	37	48.6842	0.0684732	EDN3, TMEM18, SEPT1, EFCAB6, ANKRD10, VPS53, LARP1B, IFI44L, PRUNE2, SH3YL1, CD177, SRRM2, SHISA5, COL6A2, GKAP1, BSDC1, PHF20L1, KDM5B, TOP2A, AP2M1, SLC22A1, INADL, NBPF11, CNPY2, CCL4L1, SIRT7, TMEM209, ANXA2, TMEM134, SLC4A10, RPS6KA2, IQCG, DNMT1, SPATS2L, PRKRIR, DST, SETD4	76	7488	19235	1.25059	0.999997	0.880914	58.2589
GOTERM_BP_FAT	GO:0022403~cell cycle phase	5	6.57895	0.0701411	ANAPC1, RAD51C, PRUNE2, KIF11, SIRT7	52	414	13528	3.14195	1	0.994041	66.1136
GOTERM_BP_FAT	GO:0007049~cell cycle	7	9.21053	0.0703291	ANAPC1, RAD51C, PRUNE2, KIF11, SEPT1, SIRT7, DST	52	776	13528	2.34675	1	0.990181	66.2154
UP_SEQ_FEATURE	splice variant	37	48.6842	0.0706771	EDN3, TMEM18, SEPT1, EFCAB6, ANKRD10, VPS53, LARP1B, IFI44L, PRUNE2, SH3YL1, CD177, SRRM2, SHISA5, COL6A2, GKAP1, BSDC1, PHF20L1, KDM5B, TOP2A, AP2M1, SLC22A1, INADL, NBPF11, CNPY2, CCL4L1, SIRT7, TMEM209, ANXA2, TMEM134, SLC4A10, RPS6KA2, IQCG, DNMT1, SPATS2L, PRKRIR, DST, SETD4	76	7458	19113	1.24766	1	1	63.9723
GOTERM_BP_FAT	GO:0045104~intermediate filament cytoskeleton organization	2	2.63158	0.0728082	SOD1, DST	52	20	13528	26.0154	1	0.987183	67.5315
GOTERM_CC_FAT	GO:0044420~extracellular matrix part	3	3.94737	0.076611	COL15A1, DST, ANXA2	51	117	12782	6.42634	0.999994	0.909922	61.4379
GOTERM_CC_FAT	GO:0044421~extracellular region part	8	10.5263	0.0783367	EDN3, FKTN, COL6A2, COL15A1, CCL4L1, SOD1, DST, ANXA2	51	960	12782	2.08856	0.999996	0.871648	62.2907
GOTERM_BP_FAT	GO:0045103~intermediate filament-based process	2	2.63158	0.0797966	SOD1, DST	52	22	13528	23.6503	1	0.987644	70.9886
UP_SEQ_FEATURE	lipid moiety-binding region:GPI-anchor amidated glycine	2	2.63158	0.0865096	CD177, NRN1	76	23	19113	21.8684	1	0.999993	71.6405
GOTERM_BP_FAT	GO:0042743~hydrogen peroxide metabolic process	2	2.63158	0.0901824	CYBB, SOD1	52	25	13528	20.8123	1	0.990041	75.4972
GOTERM_BP_FAT	GO:0006801~superoxide metabolic process	2	2.63158	0.0901824	CYBB, SOD1	52	25	13528	20.8123	1	0.990041	75.4972
GOTERM_BP_FAT	GO:0030262~apoptotic nuclear changes	2	2.63158	0.0936187	SOD1, TOP2A	52	26	13528	20.0118	1	0.988337	76.8389
UP_SEQ_FEATURE	compositionally biased region:Arg-rich	3	3.94737	0.0985382	SRRM2, LARP1B, SIRT7	76	135	19113	5.5886	1	0.999965	76.4212
